# Supplementary material for: Gelatin/Chitosan Bilayer Patches Loaded with Cortex Phellodendron amurense/Centella asiatica Extracts for Anti-Acne Application
Source: MDPI journal article supplement (doi:10.3390/polym13040579), 2021-02-15
Supplement: s1 [file s1]

Supplementary Materials

Fig S1.

A

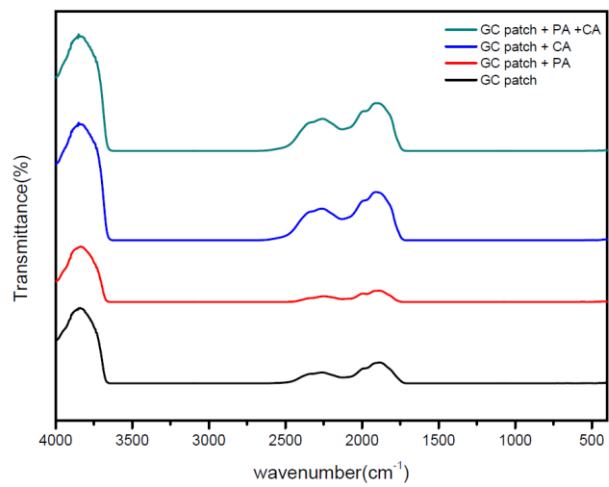

B.

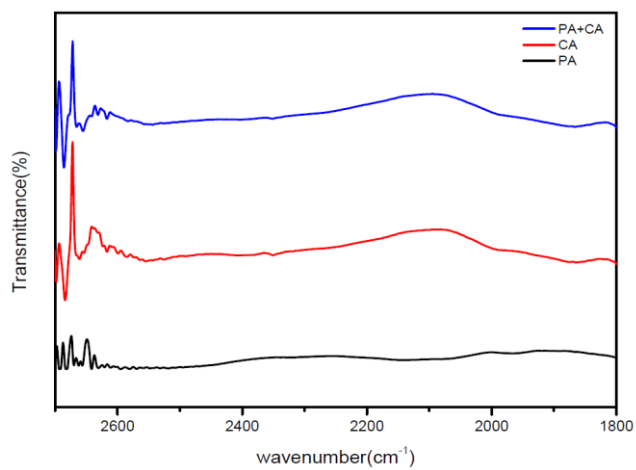

Figure S1

(A) FTIR analysis of 4 types of bilayer patches (GC, GC/PA, GC/CA, and GC/ PA+CA). (B)

FTIR analysis of the addition of herbal extracts (PA, CA, and PA+CA). GC patch is used as the control group
